# Supplementary material for: Pan-cancer analysis and experimental validation revealed the m6A methyltransferase KIAA1429 as a potential biomarker for diagnosis, prognosis, and immunotherapy
Source: publisher site journal article supplement (doi:10.18632/aging.204968), 2023-08-21
Supplement: Supplementary file [file aging-v15i17-204968-supplementary-material-SD2.pdf]

## SUPPLEMENTARY TABLE

Supplementary Table 1. Relationship between KIAA1429 expression and immune cell infiltration in six cancers.

| CellType                     | HNSC          | LIHC          | LUAD          | LUSC          | THCA          | THYM          |
|------------------------------|---------------|---------------|---------------|---------------|---------------|---------------|
|                              | (P-value/Cor) | (P-value/Cor) | (P-value/Cor) | (P-value/Cor) | (P-value/Cor) | (P-value/Cor) |
| B cells memory               | 0.05          | ***0.21       | -0.08         | 0.04          | **0.11        | */-0.22       |
| B cells naive                | **/-0.14      | -0.08         | 0.04          | -0.02         | **/-0.13      | **/-0.27      |
| Dendritic cells activated    | -0.05         | -0.06         | -0.01         | 0.07          | -0.07         | 0.02          |
| Dendritic cells resting      | 0.08          | 0.06          | */-0.1        | **/-0.12      | 0.03          | *0.2          |
| Eosinophils                  | -0.04         | 0.04          | 0.03          | 0.02          | **0.12        | -0.05         |
| Macrophages M0               | *0.1          | ***0.28       | **0.13        | ***0.25       | 0.07          | **/-0.28      |
| Macrophages M1               | 0.08          | -0.1          | *0.09         | -0.08         | **/-0.13      | ***/-0.39     |
| Macrophages M2               | -0.01         | **/-0.16      | -0.07         | -0.05         | 0.03          | ***/-0.39     |
| Mast cells activated         | 0.08          | 0.02          | 0.02          | *0.1          | */-0.1        | **/-0.29      |
| Mast cells resting           | ***/-0.15     | -0.05         | ***/-0.21     | -0.03         | **0.13        | **/-0.25      |
| Monocytes                    | **/-0.12      | ***/-0.2      | */-0.09       | -0.05         | 0.01          | -0.05         |
| Neutrophils                  | ***/-0.15     | -0.08         | */-0.09       | */-0.11       | */-0.11       | 0.15          |
| NK cells activated           | **0.13        | 0.08          | *0.11         | ***0.15       | 0.06          | */-0.22       |
| NK cells resting             | ***/-0.15     | **/-0.15      | 0             | */-0.09       | **0.13        | 0.05          |
| Plasma cells                 | */-0.09       | 0.04          | 0.03          | */-0.09       | ***/-0.17     | **/-0.3       |
| T cells CD4 memory activated | 0             | -0.02         | 0.04          | ***/-0.18     | -0.07         | ***/-0.4      |
| T cells CD4 memory resting   | -0.06         | **/-0.14      | ***/-0.2      | **/-0.14      | */-0.1        | ***/-0.32     |
| T cells CD4 naive            | 0.09          | 0             | NA            | *0.1          | 0.06          | ***0.48       |
| T cells CD8                  | -0.04         | -0.01         | *0.1          | */-0.1        | -0.06         | 0.09          |
| T cells follicular helper    | 0.07          | **0.15        | ***0.19       | ***0.17       | 0.07          | ***0.46       |
| T cells gamma delta          | 0             | 0.06          | -0.01         | 0             | *0.09         | NA            |
| T cells regulatory (Tregs)   | -0.07         | ***0.31       | 0.07          | 0.01          | -0.03         | 0.17          |

\* $P < 0.05$ , \*\* $P < 0.01$ , and \*\*\* $P < 0.001$ .
