# Supplementary material for: Pan-cancer analysis and experimental validation revealed the m6A methyltransferase KIAA1429 as a potential biomarker for diagnosis, prognosis, and immunotherapy
Source: Aging (Albany NY). 2023 Aug 21;15(17):8664–91. doi: 10.18632/aging.204968 (PMC10522386; doi:10.18632/aging.204968)
Supplement: Supplementary Table 2 [file aging-15-204968-s003.xlsx]

## Sheet: Sheet3
Supplementary Table 2. Relationship between KIAA1429 expression and immune cell infiltration in different cancers. *P < 0.05, **P < 0.01, and ***P < 0.001.
CellType	ACC	BLCA	BRCA	CESC	CHOL	COAD	DLBC	ESCA	GBM	HNSC	KICH	KIRC	KIRP	LAML	LGG	LIHC	LUAD	LUSC	MESO	OV	PAAD	PCPG	PRAD	READ	SARC	SKCM	STAD	TGCT	THCA	THYM	UCEC	UCS	UVM
	(P-value/Cor)	(P-value/Cor)	(P-value/Cor)	(P-value/Cor)	(P-value/Cor)	(P-value/Cor)	(P-value/Cor)	(P-value/Cor)	(P-value/Cor)	(P-value/Cor)	(P-value/Cor)	(P-value/Cor)	(P-value/Cor)	(P-value/Cor)	(P-value/Cor)	(P-value/Cor)	(P-value/Cor)	(P-value/Cor)	(P-value/Cor)	(P-value/Cor)	(P-value/Cor)	(P-value/Cor)	(P-value/Cor)	(P-value/Cor)	(P-value/Cor)	(P-value/Cor)	(P-value/Cor)	(P-value/Cor)	(P-value/Cor)	(P-value/Cor)	(P-value/Cor)	(P-value/Cor)	(P-value/Cor)
B cells memory	-0.08	0.02	**/-0.1	*/0.12	-0.08	0.11	0.22	-0.11	0.05	0.05	-0.14	-0.07	*/0.15	-0.04	***/-0.16	***/0.21	-0.08	0.04	0.16	-0.05	0.14	-0.09	***/0.17	0.01	0.01	0	-0.07	0.08	**/0.11	*/-0.22	-0.09	-0.03	*/-0.24
B cells naive	0.11	-0.02	-0.03	*/-0.15	0.01	0.05	-0.11	-0.13	*/0.16	**/-0.14	-0.12	-0.03	-0.03	-0.07	-0.03	-0.08	0.04	-0.02	-0.2	0.08	0.02	-0.01	-0.03	0.19	-0.11	-0.07	-0.02	***/0.44	**/-0.13	**/-0.27	0.01	-0.23	0.02
Dendritic cells activated	-0.03	0.09	-0.03	0.01	-0.03	-0.02	0.25	0.01	-0.1	-0.05	0.11	-0.07	0.04	0.06	0.05	-0.06	-0.01	0.07	-0.14	0.07	0.12	0.1	-0.01	-0.1	-0.09	*/-0.1	0.03	-0.06	-0.07	0.02	0.03	-0.07	0.05
Dendritic cells resting	0.07	-0.03	-0.03	-0.02	0.28	0.04	-0.03	0.1	-0.01	0.08	0.15	-0.06	*/0.14	0.01	0.02	0.06	*/-0.1	**/-0.12	0.06	-0.02	0.02	-0.13	-0.06	-0.04	0	-0.05	-0.03	-0.14	0.03	*/0.2	-0.01	-0.07	0.03
Eosinophils	0	0.03	0.01	0.04	0.28	-0.02	0.09	-0.04	-0.11	-0.04	-0.19	**/-0.12	-0.01	0.05	***/-0.19	0.04	0.03	0.02	-0.21	-0.01	-0.01	-0.12	0.01	-0.03	0.04	-0.05	0.02	NA	**/0.12	-0.05	0.01	-0.01	-0.03
Macrophages M0	**/0.3	0.07	-0.03	0.01	-0.02	**/0.19	*/-0.34	*/0.18	0.12	*/0.1	0.08	-0.05	0.01	-0.06	-0.01	***/0.28	**/0.13	***/0.25	-0.03	-0.02	0.11	-0.15	-0.07	*/0.22	*/0.13	0.03	0.08	-0.08	0.07	**/-0.28	0.04	0.13	0.02
Macrophages M1	**/0.3	-0.04	0.02	-0.11	-0.15	-0.05	-0.16	0.08	0	0.08	-0.16	0	0.1	0.02	-0.08	-0.1	*/0.09	-0.08	-0.05	0.07	0.02	-0.1	-0.05	0.02	-0.08	0.09	0.02	0.01	**/-0.13	***/-0.39	-0.08	-0.06	***/0.42
Macrophages M2	*/-0.27	0.07	0.01	**/0.16	-0.27	*/-0.13	-0.07	0.12	-0.08	-0.01	0.06	-0.05	***/-0.36	*/-0.14	***/0.25	**/-0.16	-0.07	-0.05	***/0.39	-0.02	-0.03	0.12	0.04	-0.09	0.09	**/0.14	0	***/-0.49	0.03	***/-0.39	0.07	0.21	-0.01
Mast cells activated	-0.01	0.08	-0.06	0.03	0.07	-0.04	0.09	-0.02	-0.08	0.08	-0.05	0.03	-0.05	0.07	**/-0.14	0.02	0.02	*/0.1	**/-0.3	-0.09	-0.09	-0.1	*/-0.11	-0.08	-0.02	0.05	0.07	-0.08	*/-0.1	**/-0.29	-0.1	-0.08	0.21
Mast cells resting	-0.11	*/-0.11	**/0.08	0.03	0.06	-0.06	-0.02	-0.14	0.07	***/-0.15	-0.07	-0.01	0.05	0.01	-0.03	-0.05	***/-0.21	-0.03	0.15	0.03	-0.1	0.13	-0.05	0.15	-0.01	0.01	**/-0.14	0.07	**/0.13	**/-0.25	***/0.26	-0.13	**/-0.34
Monocytes	0.13	-0.05	-0.04	-0.09	-0.19	-0.05	-0.07	**/-0.23	-0.1	**/-0.12	-0.12	-0.02	-0.04	-0.04	-0.08	***/-0.2	*/-0.09	-0.05	-0.13	**/-0.13	*/-0.17	0.04	-0.08	-0.02	-0.05	0.03	-0.09	-0.03	0.01	-0.05	0.13	-0.17	***/-0.46
Neutrophils	0.08	-0.07	0	-0.06	-0.25	**/-0.17	-0.01	-0.08	-0.06	***/-0.15	**/0.32	-0.07	0.04	0.07	**/-0.12	-0.08	*/-0.09	*/-0.11	0.12	-0.06	-0.07	*/-0.19	**/-0.15	0.06	-0.04	0.01	0	-0.01	*/-0.11	0.15	***/-0.27	0	0.03
NK cells activated	-0.02	-0.03	0	*/0.12	0.29	0.08	0.11	0.13	-0.04	**/0.13	-0.11	**/0.12	***/0.23	*/-0.16	0.02	0.08	*/0.11	***/0.15	0.01	0.09	0.05	-0.01	**/0.13	**/0.27	-0.07	-0.04	0	-0.12	0.06	*/-0.22	0.11	-0.15	*/0.23
NK cells resting	0.16	0.05	**/-0.1	-0.07	-0.08	0.01	0.15	-0.03	0.01	***/-0.15	0.08	0.02	0.05	**/0.22	0.07	**/-0.15	0	*/-0.09	0.17	-0.02	-0.11	0.11	0	-0.02	0.06	-0.05	0.08	-0.03	**/0.13	0.05	-0.02	-0.08	-0.17
Plasma cells	0.01	0.04	0.02	-0.07	0.12	0.06	0.27	**/-0.2	**/0.23	*/-0.09	-0.16	-0.03	0.11	**/0.18	0.04	0.04	0.03	*/-0.09	-0.01	-0.06	0.02	0.01	-0.01	-0.06	-0.11	-0.09	-0.05	0.15	***/-0.17	**/-0.3	*/-0.15	-0.17	-0.17
T cells CD4 memory activated	0.22	-0.02	-0.01	0.01	-0.01	-0.05	0	0.08	0.06	0	**/0.34	*/0.11	0.04	*/0.14	0.03	-0.02	0.04	***/-0.18	-0.14	-0.04	0.05	-0.12	-0.04	-0.12	0.03	0.03	0	-0.09	-0.07	***/-0.4	-0.07	*/-0.29	*/0.23
T cells CD4 memory resting	-0.17	-0.05	-0.01	***/-0.2	-0.03	***/-0.36	*/0.3	-0.05	-0.11	-0.06	0.05	-0.02	0.07	*/0.17	0.04	**/-0.14	***/-0.2	**/-0.14	-0.2	0.05	-0.11	-0.12	***/-0.16	***/-0.35	*/-0.13	*/0.12	0.01	**/0.28	*/-0.1	***/-0.32	-0.09	0.05	-0.2
T cells CD4 naive	0	0.03	0.01	**/0.15	0.14	-0.01	NA	0.07	0.03	0.09	0.12	0.01	0.04	0.01	-0.03	0	NA	*/0.1	NA	0.02	0	NA	0.08	0.01	-0.01	0.01	0.04	-0.16	0.06	***/0.48	-0.09	-0.05	-0.17
T cells CD8	0.14	-0.09	*/0.06	-0.01	0.03	0.11	-0.2	-0.02	0.02	-0.04	0.05	0.08	*/0.14	-0.09	**/-0.14	-0.01	*/0.1	*/-0.1	-0.19	-0.05	-0.07	0.03	0.07	-0.02	-0.08	*/-0.12	-0.03	0.09	-0.06	0.09	-0.04	-0.05	***/0.45
T cells follicular helper	0.16	-0.03	0.01	0.11	0.05	0.08	0.15	0.03	*/0.19	0.07	0.1	0.07	***/0.32	-0.12	-0.01	**/0.15	***/0.19	***/0.17	0.06	**/0.16	*/0.15	0.05	***/0.2	0.11	-0.01	-0.08	***/0.17	0.03	0.07	***/0.46	0.09	-0.08	***/0.39
T cells gamma delta	-0.1	-0.03	0.06	-0.03	NA	0.06	-0.11	0	0.04	0	-0.14	0.03	0.09	0.06	0	0.06	-0.01	0	-0.01	0.03	***/-0.29	NA	-0.05	0.04	-0.02	*/0.1	-0.05	*/0.21	*/0.09	NA	0.03	0.26	0.21
T cells regulatory (Tregs)	0.18	*/-0.11	-0.02	-0.01	*/0.37	0.08	0.03	*/-0.18	0.13	-0.07	0.14	0.05	**/0.16	-0.08	0.02	***/0.31	0.07	0.01	0.12	-0.06	0.09	0.05	***/0.21	-0.07	0	***/-0.28	-0.09	***/0.29	-0.03	0.17	-0.04	0.1	-0.07
*P < 0.05, **P < 0.01, and ***P < 0.001.
